# Supplementary material for: Highly efficient organic light emitting diodes based on a D–A–D type dibenzothiophene derivative exhibiting thermally activated delayed fluorescence with small ΔEST
Source: Royal Society of Chemistry journal article supplement (doi:10.1039/c6tc03382b), 2016-01-01
Supplement: c6tc03382b1.pdf [file c6tc03382b1.pdf]

## Supporting Information for

**Highly efficient organic light emitting diodes based on a D-A-D type  
dibenzothiophene derivative exhibiting thermally activated delayed  
fluorescence with small  $\Delta E_{ST}$**

Xin He, Tong Shan, Xiangyang Tang, Yu Gao, Jinyu Li, Bing Yang and Ping Lu\*

### **Contents**

S-1 General Methods

S-2 Synthesis of DPAC-DBTDO

S-3 Thermal and Electrochemical Property

S-4 Single Crystal Data

S-5 Theoretical Calculation

S-6 Supplementary Photophysical Property

S-7 Electroluminescence Property

## S-1 General Methods

### General information

All the reagents and solvents used for the syntheses were purchased from Aldrich and Acros and used as received. The  $^1\text{H}$  NMR spectra were recorded on Bruker AVANCE 500 spectrometer at 500 MHz at 298 K, using DMSO- $\text{D}_6$  as solvent and tetramethylsilane (TMS) as internal standard. The elemental analysis were performed by a Flash EA 1112, CHNS-O elemental analysis instrument. The MALDI-TOF-MS mass spectra were measured using an AXIMA-CFRTM plus instrument. Thermal gravimetric analysis (TGA) was measured on a Perkin-Elmer thermal analysis system from 30 °C to 900 °C at a heating rate of 10 K/min under nitrogen flow rate of 80 mL/min. Differential scanning calorimetry (DSC) was performed on a NETZSCH (DSC-204) unit from 30 °C to 400 °C at a heating rate of 10K/min under nitrogen atmosphere. The electrochemical properties (oxidation and reduction potentials) were carried out via cyclic voltammetry (CV) measurements by using a standard one-compartment, three-electrode electrochemical cell given by a BAS 100B/W electrochemical analyzer. Tetrabutylammoniumhexafluorophosphate (TBAPF6) in anhydrous dimethyl formamide (DMF) or anhydrous dichloromethane (0.1 M) were used as the electrolyte for negative or positive scan. UV-vis and fluorescence spectra were recorded on a Shimadzu UV-3100 spectrophotometer using 1 cm path length quartz cells. The fluorescence lifetime and PLQY ( $\Phi_F$ ) of the prepared films were measured by FLS920 spectrometer. The  $\Phi_F$  of different solutions were determined by using 0.1 M quinine sulfate as a reference ( $\Phi_F = 0.546$ ) and were calculated by using the following formula:

$$Q_x = Q_r \left( \frac{A_r(\lambda_r)}{A_x(\lambda_x)} \right) \left( \frac{I(\lambda_r)}{I(\lambda_x)} \right) \left( \frac{n_x^2}{n_r^2} \right) \left( \frac{D_x}{D_r} \right)$$

Where Q is the PLQY, A is the value of absorbance, I is the intensity of excitation source, n is the refractive index of solvent, D is the area of emission spectra,  $\lambda$  is the corresponding wavelength. The subscript r stands for the reference while x stands for test subject. The excitation wavelength was 340 nm.

### Device fabrication

ITO glass was used as the substrate and the sheet resistance was 20  $\Omega$  square $^{-1}$ . The ITO glass substrates were cleaned with isopropyl alcohol, acetone, toluene and deionized water, dried in an oven at 120 °C, treated with UV-zone for 20 min, and finally transferred to a vacuum deposition system with a base pressure lower than  $5 \times 10^{-6}$  mbar for organic and metal deposition. The deposition rate of all organic layers was 1.0  $\text{\AA}$  s $^{-1}$ . The cathode LiF (1 nm) was deposited at a rate of 0.1  $\text{\AA}$  s $^{-1}$  and then the capping Al metal layer (100 nm) was deposited at a rate of 4.0  $\text{\AA}$  s $^{-1}$ . The electroluminescent (EL) characteristics were measured using a Keithley 2400 programmable electrometer and a PR-650 Spectroscan spectrometer under ambient condition at room temperature.

## Computational Details

The ground-state ( $S_0$ ) geometries were optimized at the B3LYP/6-31G(d, p) level. The HOMO/LUMO distributions are calculated on the basis of optimized  $S_0$  state. The higher absorption energy levels of both singlet and triplet states were calculated using TD-M062X/6-31G(d, p) method on the basis of the optimized configuration of  $S_0$ . For the purpose of investigating the properties of excited-states, natural transition orbitals (NTOs) of absorption were evaluated for the five lowest excited-states, involving both singlet and triplet states under TD-M062X/6-31G(d, p) level. This approach provides the most compact representation of the electronic transitions in terms of an expansion into single particle orbitals by diagonalizing the transition density matrix associated with each excitation.

## S-2 Synthesis of DPAC-DBTDO

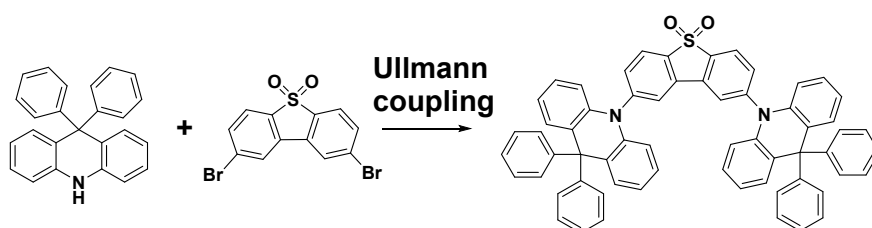

**Scheme S1.** Synthesis route of DPAC-DBTDO.

Synthesis of DPAC-DBTDO: A solution of 9,9-diphenyl-9,10-dihydroacridine (DPAC) (3.50 g, 10.5 mmol), 2,8-dibromodibenzo[b,d]thiophene 5,5-dioxide (1.87 g, 5 mmol),  $\text{Pd}_2(\text{dba})_3$  (115.5 mg, 0.3 mmol), tri-tert-butylphosphine tetrafluoroborate (232 mg, 0.5 mmol) and sodium tert-butoxide (2.54 g, 15 mmol) were dissolved in toluene (30 mL). After degassed, the mixture was refluxed at 110 °C for 24 h under nitrogen. After cooling to room temperature, 50 mL water was added and the mixture was extracted with  $\text{CH}_2\text{Cl}_2$ . The combined organic layer was dried over anhydrous magnesium sulphate. Then the mixture was concentrated. After recrystallization in ethanol, the light yellow powder was gained (3.69 g). Yield: 84%.  $^1\text{H}$  NMR (500 MHz, DMSO, ppm,  $\delta$ ) 8.26 (d,  $J = 8.1$  Hz, 2H), 8.03 (s, 2H), 7.36 – 7.18 (m, 14H), 7.13 (dd,  $J = 11.3, 4.3$  Hz, 4H), 7.02 – 6.89 (m, 12H), 6.81 (dd,  $J = 7.80, 1.4$  Hz, 4H), 6.49 (d,  $J = 8.3$  Hz, 4H). MS (MALDI-TOF)  $m/z$ :  $[\text{M}^+]$  calcd for  $\text{C}_{62}\text{H}_{42}\text{N}_2\text{O}_2\text{S}$ , 878.30; found, 879.30. Elem. Anal. Calcd for  $\text{C}_{62}\text{H}_{42}\text{N}_2\text{O}_2\text{S}$ : C, 84.71; H, 4.82; N, 3.19. Found: C, 84.38; H, 4.98; N, 3.22.

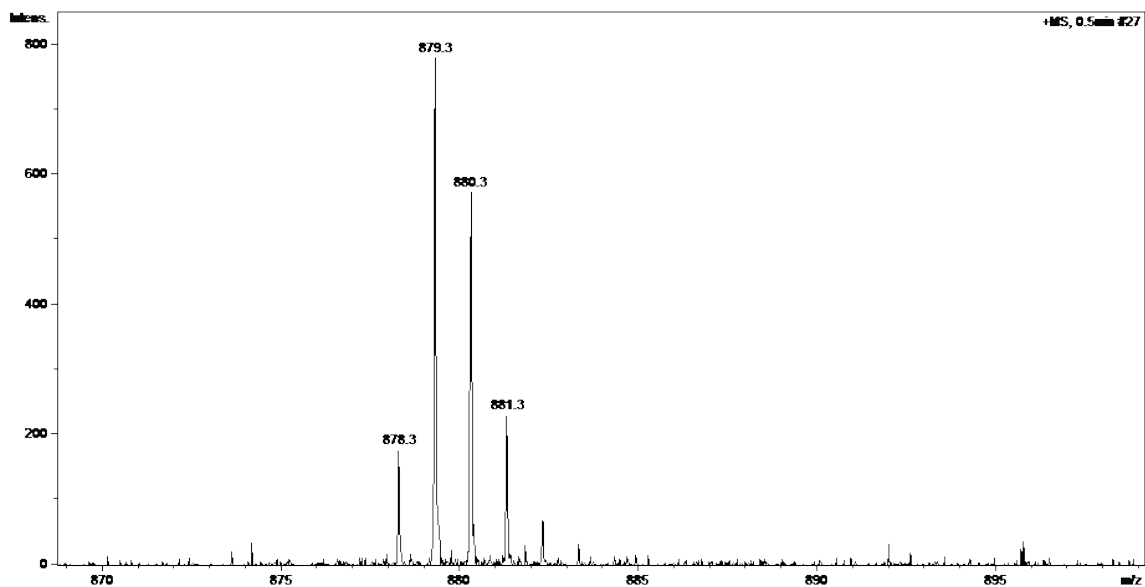

Figure S1. MALDI-TOF spectrum of DPAC-DBTDO.

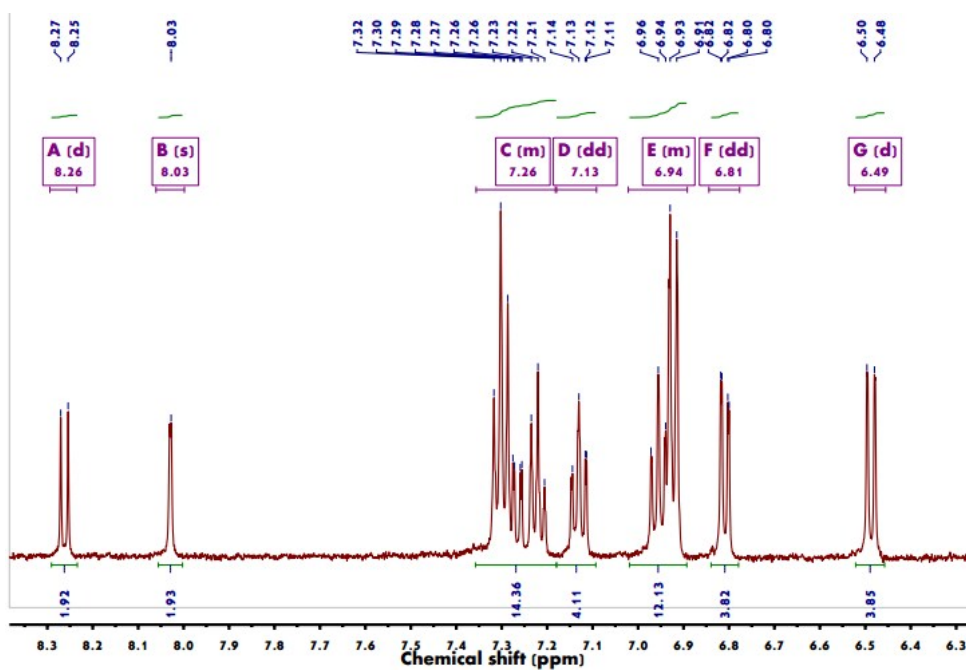

Figure S2. <sup>1</sup>H NMR spectrum of DPAC-DBTDO in DMSO.

### S-3 Thermal and Electrochemical Property

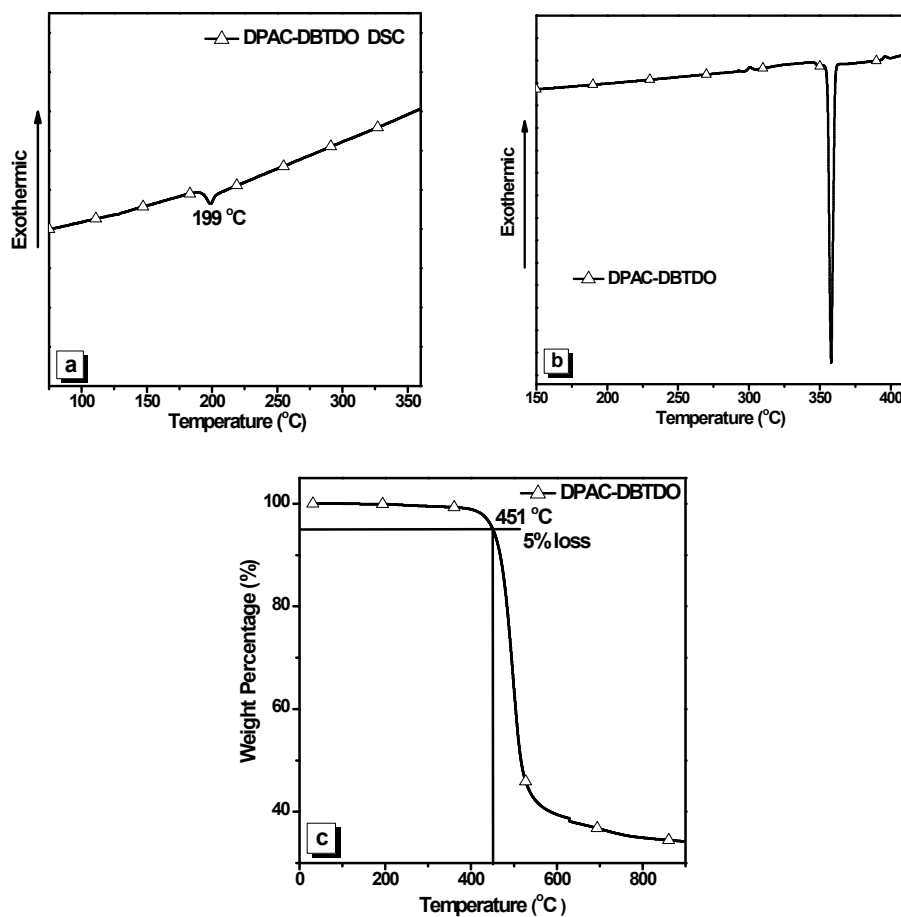

**Figure S3.** (a) DSC test: glass-transition temperature ( $T_g$ ) of 199 °C; (b) melt point of 358 °C of DPAC-DBTDO; (c) TGA test: decomposition temperature ( $T_d$ ) of 451 °C of DPAC-DBTDO.

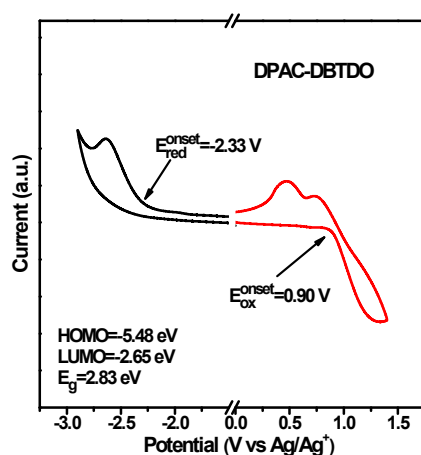

**Figure S4.** Cyclic voltammetry grams of DPAC-DBTDO. The potentials are calibrated against  $\text{Fc}^+/\text{Fc}$  internal standard.

#### S-4 Single Crystal Data

The single crystal of DPAC-DBTDO was prepared by vapor deposition method. The diffraction experiments were carried out on a Rigaku R-AXIS RAPID diffractometer equipped with a MO-Koandcontrol Software using the RAPID AUTO at 293 ( $\pm 2$ ) °C. The crystal structures were solved with direct methods and refined with a full-matrix least-squares technique using the SHELXS programs. All angles and distances in crystals were measured using Mecury 1.4.1 Software.

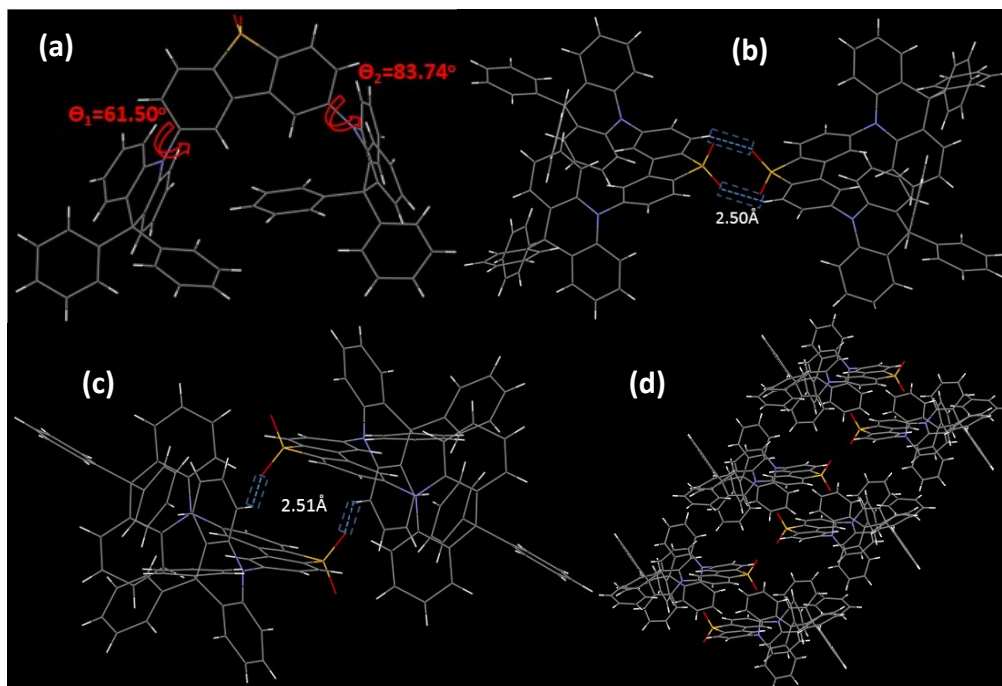

**Figure S5.** Single crystal structure of DPAC-DBTDO: (a) molecular structure; (b) & (c) Two existent hydrogen bonds; (d) packing structure.

**Table S1.** Crystallographic Data.

|                                        |                                                                 |
|----------------------------------------|-----------------------------------------------------------------|
| Empirical formula                      | C <sub>62</sub> H <sub>42</sub> N <sub>2</sub> O <sub>2</sub> S |
| Formula weight                         | 879.04                                                          |
| Crystal size                           | 0.13*0.12*0.10 mm                                               |
| Temperature                            | 293(2) K                                                        |
| Crystal system                         | Triclinic                                                       |
| Space group                            | P -1                                                            |
| a, Å                                   | 9.907(2)                                                        |
| b, Å                                   | 14.375(3)                                                       |
| c, Å                                   | 16.621(3)                                                       |
| $\alpha$ , deg                         | 97.46(3)                                                        |
| $\beta$ , deg                          | 91.84(3)                                                        |
| $\gamma$ , deg                         | 105.68(3)                                                       |
| Z                                      | 2                                                               |
| Calculated density, g cm <sup>-3</sup> | 1.295                                                           |

#### S-5 Theoretical Calculation

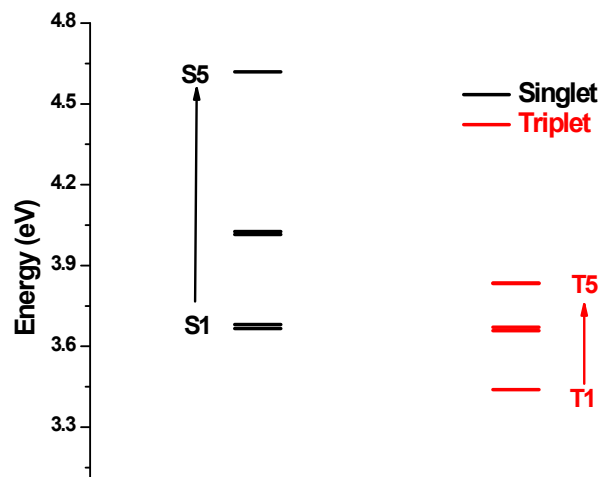

**Figure S6.** TD-DFT calculation of energy levels of DPAC-DBTDO.

**Table S2.** Calculated energy of singlet and triplet of DPAC-DBTDO.

|              | 1      | 2      | 3      | 4      | 5      |
|--------------|--------|--------|--------|--------|--------|
| Singlet (eV) | 3.6665 | 3.6810 | 4.0156 | 4.0261 | 4.6190 |
| Triplet (eV) | 3.4394 | 3.6580 | 3.6708 | 3.8334 | 3.8351 |

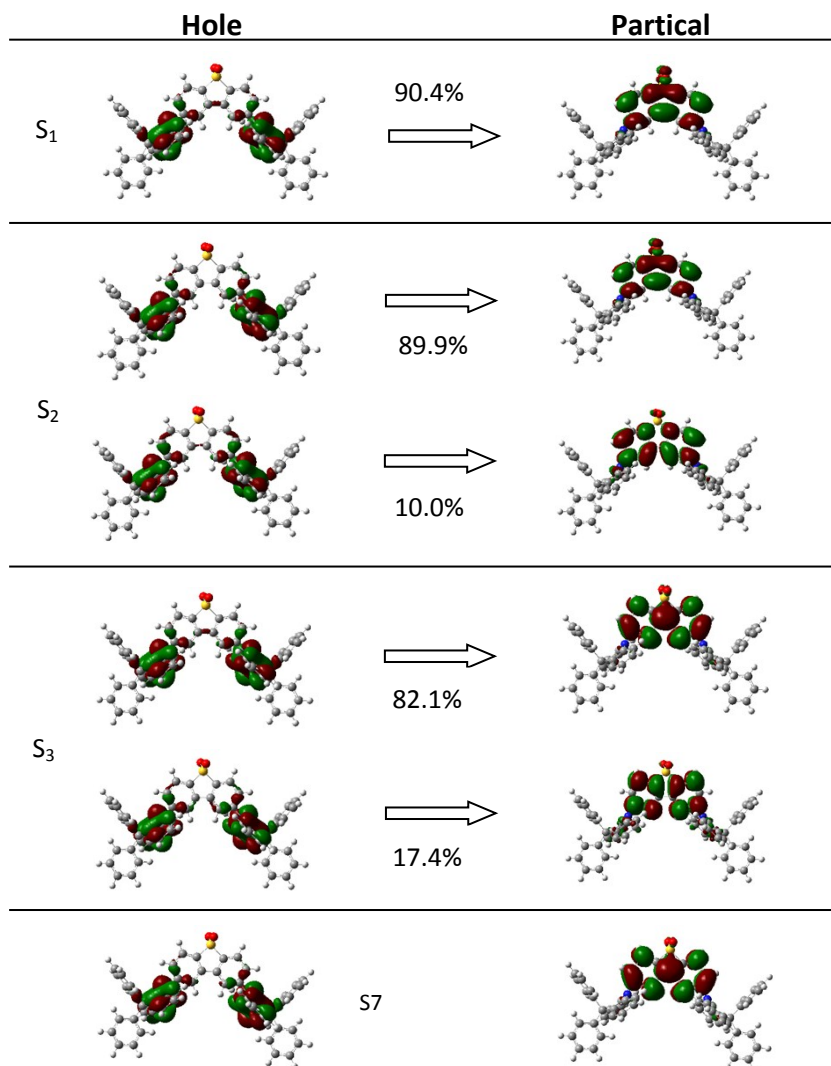

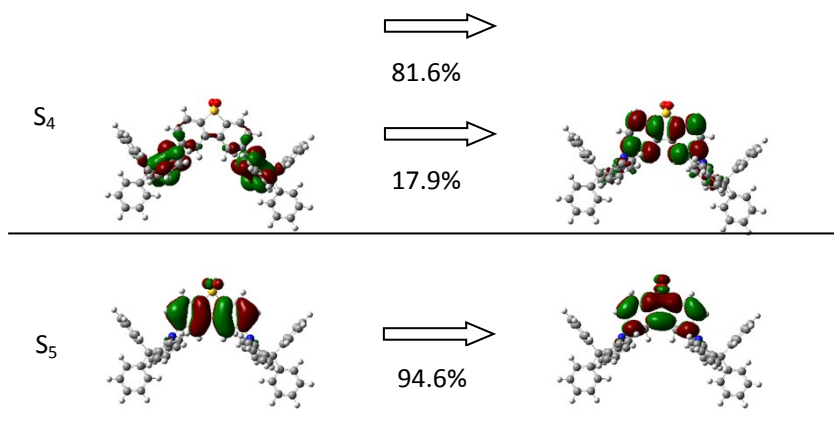

**Figure S7.** The  $S_1$  to  $S_5$  natural transition orbitals (NTO) of DPAC-DBTDO.

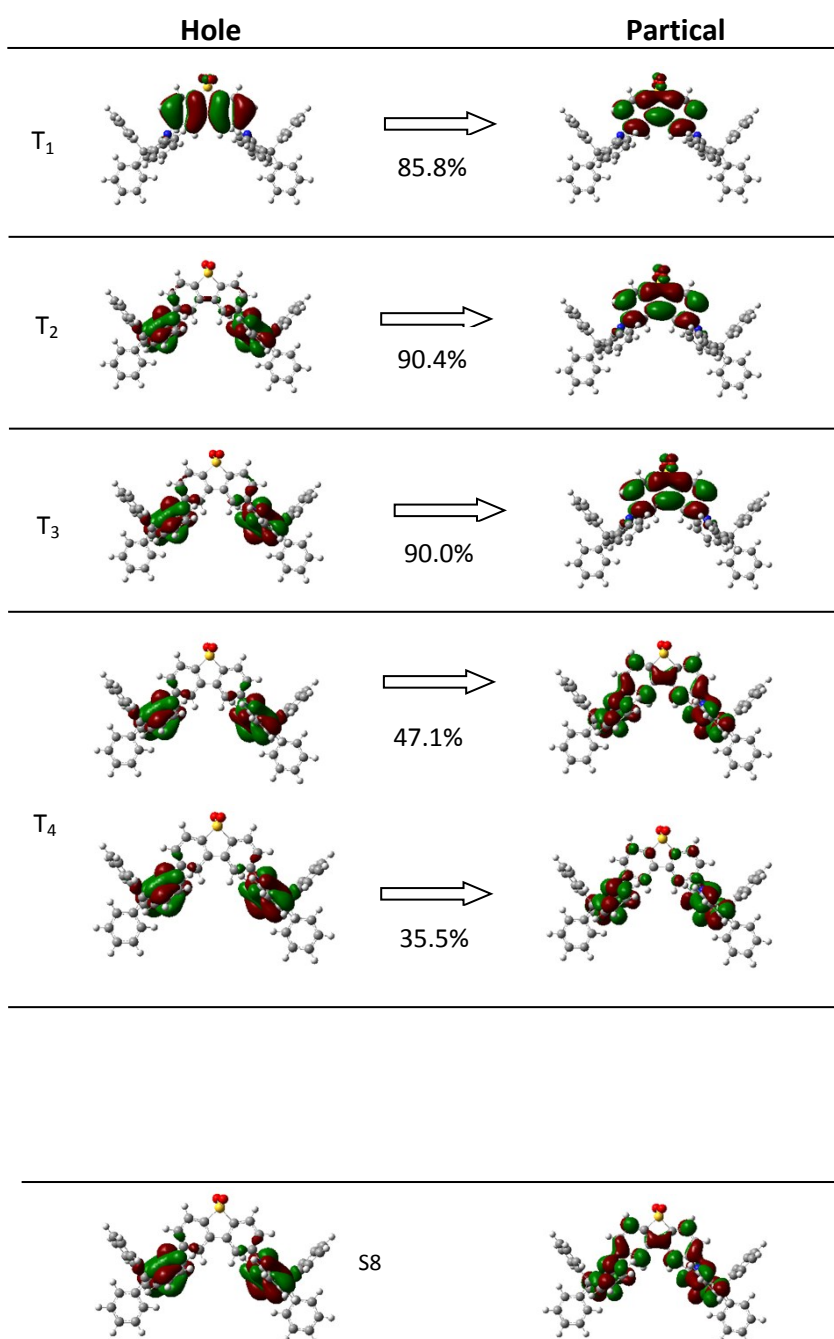



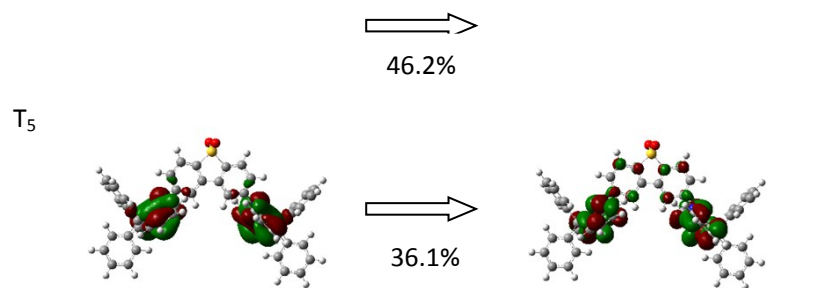

Figure S8. The  $T_1$  to  $T_5$  natural transition orbitals (NTO) of DPAC-DBTDO.

### Calculated Geometry Data for DPAC-DBTDO ( $S_0$ optimization: unit Å)

|   |             |             |             |
|---|-------------|-------------|-------------|
| C | -1.68400200 | 2.46656700  | 1.53951000  |
| C | -1.97475400 | 2.90250500  | 2.83798900  |
| C | -1.49279000 | 2.19874000  | 3.94505300  |
| C | -0.72467100 | 1.06876300  | 3.71342400  |
| C | -0.41599600 | 0.61139100  | 2.42455500  |
| C | -0.90470600 | 1.32095000  | 1.32676300  |
| H | -2.58024800 | 3.79333900  | 2.96500900  |
| H | -1.71389200 | 2.52784800  | 4.95496500  |
| H | -0.69576600 | 1.00361700  | 0.31033300  |
| C | 0.72467100  | -1.06876300 | 3.71342400  |
| C | 1.49279000  | -2.19874000 | 3.94505300  |
| C | 1.97475400  | -2.90250500 | 2.83798900  |
| C | 1.68400200  | -2.46656700 | 1.53951000  |
| C | 0.90470600  | -1.32095000 | 1.32676300  |
| C | 0.41599600  | -0.61139100 | 2.42455500  |
| H | 1.71389200  | -2.52784800 | 4.95496500  |
| H | 2.58024800  | -3.79333900 | 2.96500900  |
| H | 0.69576600  | -1.00361700 | 0.31033300  |
| O | 1.05063800  | 0.71102700  | 5.71111000  |
| O | -1.05063800 | -0.71102700 | 5.71111000  |
| N | -2.20490400 | 3.21218900  | 0.43324200  |
| C | -3.41817300 | 2.80997000  | -0.16819400 |
| C | -1.38543000 | 4.15332000  | -0.22842100 |
| C | -3.99049200 | 1.55850700  | 0.11293900  |
| C | -4.05181000 | 3.68349900  | -1.07655400 |
| C | -1.97934400 | 5.05171400  | -1.13974300 |
| C | 0.00000000  | 4.20164500  | -0.00265600 |
| C | -5.16395100 | 1.16117400  | -0.52141100 |
| H | -3.51492400 | 0.89256400  | 0.82224800  |
| C | -5.21595900 | 3.24707600  | -1.71733200 |
| C | -3.51486100 | 5.11862200  | -1.21522000 |

|   |             |             |             |
|---|-------------|-------------|-------------|
| C | -1.15073100 | 5.93292500  | -1.84202100 |
| H | 0.45676200  | 3.52797100  | 0.71164500  |
| C | 0.79637800  | 5.10765900  | -0.69727000 |
| C | -5.77605200 | 1.99765700  | -1.45259900 |
| H | -5.58926600 | 0.18889400  | -0.29072800 |
| H | -5.70415300 | 3.91194300  | -2.42072400 |
| C | -3.96114900 | 5.73668700  | -2.56094600 |
| C | -4.03710600 | 5.96281500  | -0.00747800 |
| C | 0.22773800  | 5.96839000  | -1.63380200 |
| H | -1.60124800 | 6.62069400  | -2.54850100 |
| H | 1.86576100  | 5.12753100  | -0.50883100 |
| H | -6.68685700 | 1.69213500  | -1.95762300 |
| C | -3.59124500 | 5.09877400  | -3.75852800 |
| C | -4.71425400 | 6.91173500  | -2.64802800 |
| C | -3.28313100 | 7.02415500  | 0.51466600  |
| C | -5.29665100 | 5.71433300  | 0.55800800  |
| H | 0.84325800  | 6.67149500  | -2.18581200 |
| C | -3.96244800 | 5.61698400  | -4.99579700 |
| H | -3.00518300 | 4.18598500  | -3.71416700 |
| C | -5.08850600 | 7.43476100  | -3.89075900 |
| H | -5.01443500 | 7.42899900  | -1.74464200 |
| C | -3.76881100 | 7.80747400  | 1.56303800  |
| H | -2.30386600 | 7.24233700  | 0.10452400  |
| C | -5.78410600 | 6.49639200  | 1.60624900  |
| H | -5.90448800 | 4.89953500  | 0.18183900  |
| C | -4.71589200 | 6.79219300  | -5.06803400 |
| H | -3.66325600 | 5.10344600  | -5.90513000 |
| H | -5.67385500 | 8.34904700  | -3.92954000 |
| C | -5.02204400 | 7.54709800  | 2.11655900  |
| H | -3.16021700 | 8.62095300  | 1.94803100  |
| H | -6.76232400 | 6.27770000  | 2.02533300  |
| H | -5.00675300 | 7.19862000  | -6.03230300 |
| H | -5.39885700 | 8.15311900  | 2.93535700  |
| N | 2.20490400  | -3.21218900 | 0.43324200  |
| C | 3.41817300  | -2.80997000 | -0.16819400 |
| C | 1.38543000  | -4.15332000 | -0.22842100 |
| C | 3.99049200  | -1.55850700 | 0.11293900  |
| C | 4.05181000  | -3.68349900 | -1.07655400 |
| C | 1.97934400  | -5.05171400 | -1.13974300 |
| C | 0.00000000  | -4.20164500 | -0.00265600 |
| C | 5.16395100  | -1.16117400 | -0.52141100 |
| H | 3.51492400  | -0.89256400 | 0.82224800  |
| C | 5.21595900  | -3.24707600 | -1.71733200 |
| C | 3.51486100  | -5.11862200 | -1.21522000 |

|   |             |             |             |
|---|-------------|-------------|-------------|
| C | 1.15073100  | -5.93292500 | -1.84202100 |
| H | -0.45676200 | -3.52797100 | 0.71164500  |
| C | -0.79637800 | -5.10765900 | -0.69727000 |
| C | 5.77605200  | -1.99765700 | -1.45259900 |
| H | 5.58926600  | -0.18889400 | -0.29072800 |
| H | 5.70415300  | -3.91194300 | -2.42072400 |
| C | 3.96114900  | -5.73668700 | -2.56094600 |
| C | 4.03710600  | -5.96281500 | -0.00747800 |
| C | -0.22773800 | -5.96839000 | -1.63380200 |
| H | 1.60124800  | -6.62069400 | -2.54850100 |
| H | -1.86576100 | -5.12753100 | -0.50883100 |
| H | 6.68685700  | -1.69213500 | -1.95762300 |
| C | 3.59124500  | -5.09877400 | -3.75852800 |
| C | 4.71425400  | -6.91173500 | -2.64802800 |
| C | 3.28313100  | -7.02415500 | 0.51466600  |
| C | 5.29665100  | -5.71433300 | 0.55800800  |
| H | -0.84325800 | -6.67149500 | -2.18581200 |
| C | 3.96244800  | -5.61698400 | -4.99579700 |
| H | 3.00518300  | -4.18598500 | -3.71416700 |
| C | 5.08850600  | -7.43476100 | -3.89075900 |
| H | 5.01443500  | -7.42899900 | -1.74464200 |
| C | 3.76881100  | -7.80747400 | 1.56303800  |
| H | 2.30386600  | -7.24233700 | 0.10452400  |
| C | 5.78410600  | -6.49639200 | 1.60624900  |
| H | 5.90448800  | -4.89953500 | 0.18183900  |
| C | 4.71589200  | -6.79219300 | -5.06803400 |
| H | 3.66325600  | -5.10344600 | -5.90513000 |
| H | 5.67385500  | -8.34904700 | -3.92954000 |
| C | 5.02204400  | -7.54709800 | 2.11655900  |
| H | 3.16021700  | -8.62095300 | 1.94803100  |
| H | 6.76232400  | -6.27770000 | 2.02533300  |
| H | 5.00675300  | -7.19862000 | -6.03230300 |
| H | 5.39885700  | -8.15311900 | 2.93535700  |
| S | 0.00000000  | 0.00000000  | 4.96917300  |

## S-6 Supplementary Photophysical Property

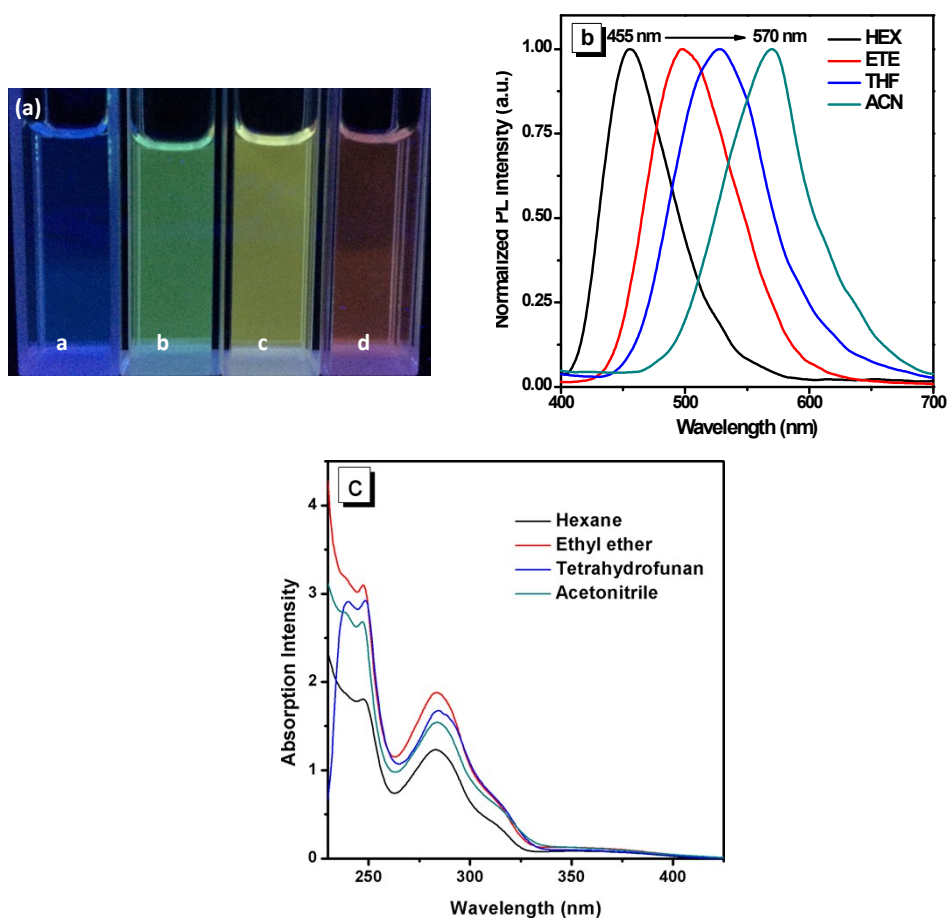

**Figure S9.** (a) Fluorescent images of DPAC-DBDTO in different solvents upon excitation with a 365 nm light source (from a to d are hexane (HEX), ethyl ether (ETE), tetrahydrofuran (THF) and acetonitrile (ACN), respectively); (b) Fluorescence spectra of DPAC-DBDTO in different solvents with the concentration of 0.01 mM; (c) Absorption spectra of DPAC-DBDTO in different solvents with the concentration of 0.01 mM.

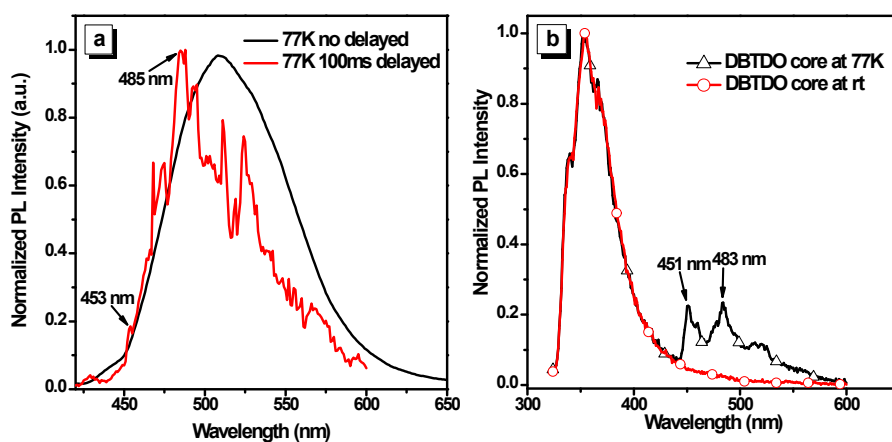

**Figure S10.** (a) Transient PL spectrum of DPAC-DBDTO in toluene at 77 K (b) Steady state spectrum of DBDTO core in toluene at room temperature and 77 K.

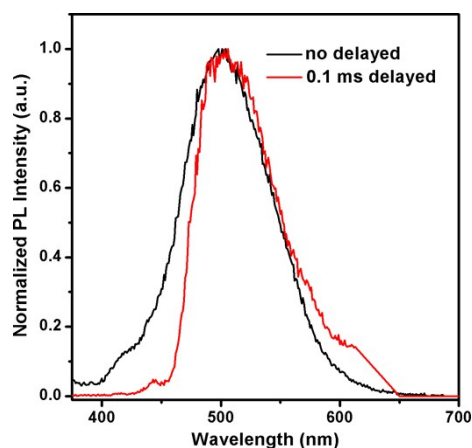

**Figure S11.** Transient PL spectrum of 15 wt% DPAC-DBTDO:DPEPO doped film at 300 K.

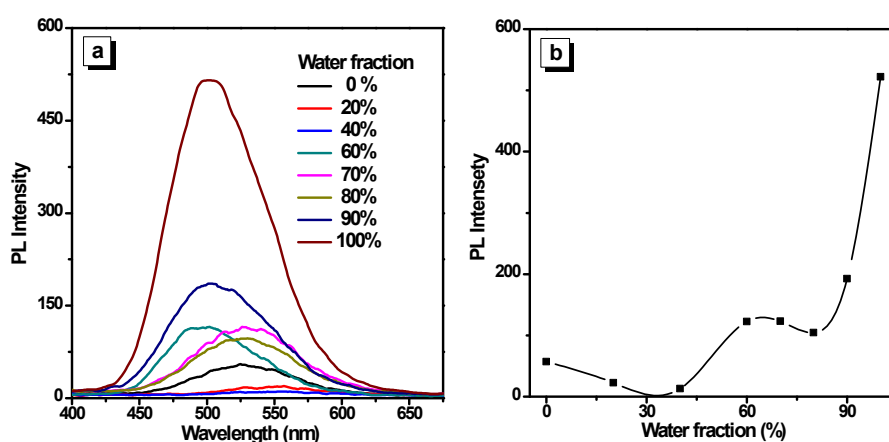

**Figure S12.** (a) Fluorescence spectra of DPAC-DBTDO in tetrahydrofuran and water mixtures; (b) Changes in the maximum emission intensity of DPAC-DBTDO versus the volume fraction of water in the mixtures of tetrahydrofuran and water.

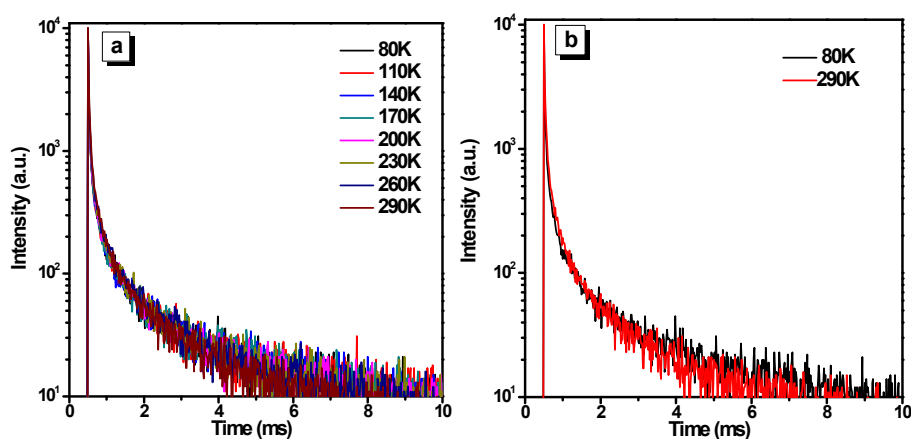

**Figure S13.** (a) Temperature dependence of transient PL decay of 15 wt% DPAC-DBTDO:DPEPO doped film in the time range of 10 ms; (b) Extracted transient PL decay of 15 wt% DPAC-DBTDO:DPEPO doped film at 80 K and 290 K.

**Table S3.** Fitting results of the transient PL decay of 15 wt% DPAC-DBTDO:DPEPO doped film in the time range of 10 ms (80 K to 290 K).

|              | $\tau_1$ (ns) | $\tau_2$ ( $\mu$ s) | $\tau_3$ ( $\mu$ s) | $\chi^2$ |
|--------------|---------------|---------------------|---------------------|----------|
| <b>80 K</b>  | 26.32         | 237.6               | 1957                | 1.569    |
| <b>110 K</b> | 28.37         | 242.7               | 1775                | 1.331    |
| <b>140 K</b> | 26.14         | 231.7               | 1885                | 1.454    |
| <b>170 K</b> | 24.27         | 212.3               | 1959                | 1.330    |
| <b>200 K</b> | 27.15         | 207.1               | 1587                | 1.208    |
| <b>230 K</b> | 27.38         | 202.4               | 1675                | 1.501    |
| <b>260 K</b> | 26.06         | 219.6               | 1632                | 1.311    |
| <b>290 K</b> | 30.41         | 246.6               | 1717                | 1.394    |

**Table S4.** Photophysics properties of DPAC-DBTDO.

| $\lambda_{Abs}$ <sup>a</sup><br>(nm) | $\lambda_{PL}$ (nm)     |            | $\Phi_f$ <sup>c</sup><br>(%) | $\Phi_f$ <sup>d</sup> (%) |            |            |                         | $E_g$ <sup>f</sup><br>(eV) | HOMO/LUMO <sup>g</sup><br>(eV) |
|--------------------------------------|-------------------------|------------|------------------------------|---------------------------|------------|------------|-------------------------|----------------------------|--------------------------------|
|                                      | doped film <sup>b</sup> | neat film  |                              | HEX                       | ETE        | THF        | ACN                     |                            |                                |
| <b>291, 320</b>                      | <b>486</b>              | <b>498</b> | <b>100</b>                   | <b>2.4</b>                | <b>4.2</b> | <b>2.7</b> | <b>n.o.<sup>e</sup></b> | <b>2.68</b>                | <b>-5.43 /-2.44</b>            |

<sup>a</sup> Absorption: measured in neat film. <sup>b</sup> 5 wt% PMMA doped film. <sup>c</sup> Photoluminescent quantum yield by integrating sphere of a 15 wt% DPEPO doped film. <sup>d</sup> Relative fluorescence quantum yield [estimated by using quinine sulfate as standard ( $\Phi_f = 54.6\%$  in 0.1 M sulfuric acid solution)]. <sup>e</sup> n.o. = not observed. <sup>f</sup> Optical gap calculated from the absorption onset of neat film. <sup>g</sup> Measured by cyclic voltammetry.

### S-7 Electroluminescence Property

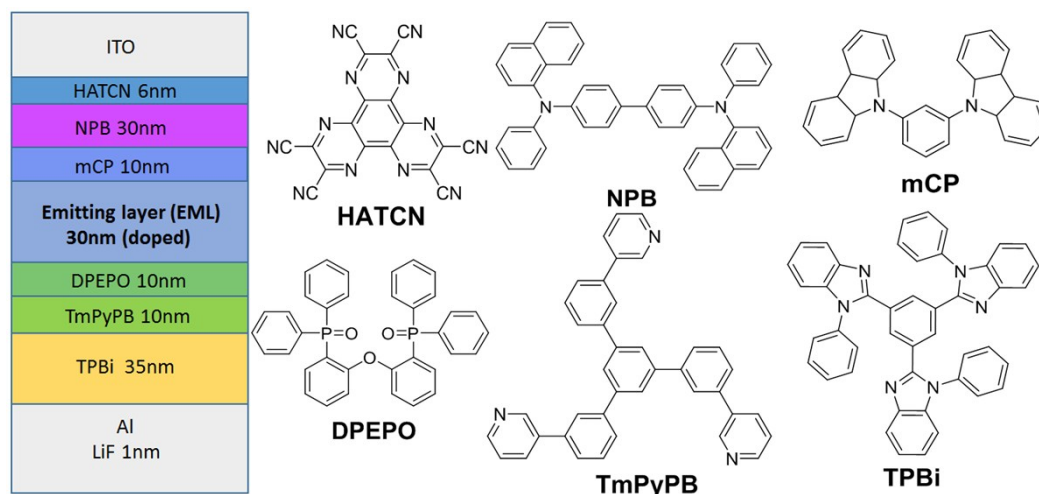

**Figure S14.** OLED structure and the molecular structures of compounds used in device.

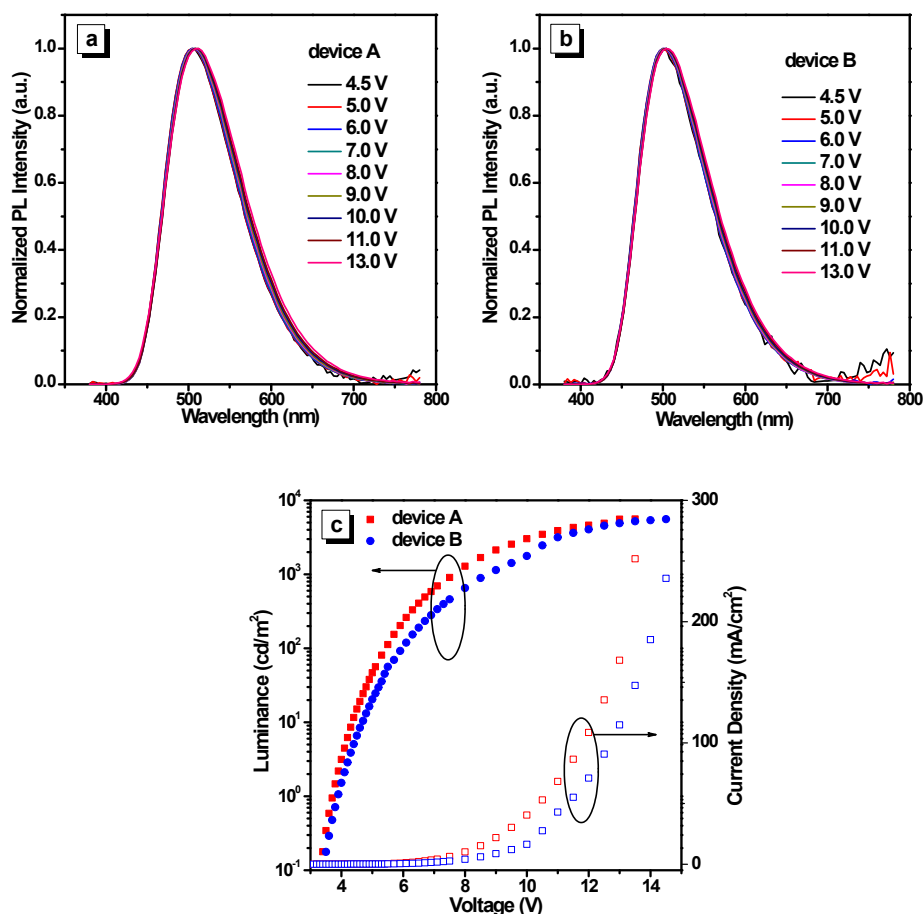

**Figure S15.** (a) and (b) EL spectra of device A and device B under different voltage, respectively; (c) luminance-voltage-current characteristics of device A and device B. Device A: ITO/HATCN (6 nm)/NPB (30 nm)/mCP (10 nm) /DPAC-DBTBO : DPEPO (15 : 85) (30 nm)/DPEPO (10 nm)/TmPyPB (10 nm)/TPBi (35 nm)/LiF (1 nm)/Al (120 nm); Device B: ITO/HATCN (6 nm)/NPB (30 nm)/mCP (10 nm) /mCP : DPAC-DBTDO 15 wt% (5 nm); DPEPO : DPAC-DBTDO 15 wt% (25 nm)/DPEPO (10 nm)/TmPyPB (10 nm)/TPBi (35 nm)/LiF (1 nm)/Al (120 nm).

**Table S5.** EL performance of the devices

| device | $V_{on}^a$<br>(V) | $L_{max}^b$<br>(cd m <sup>-2</sup> ) | $PE_{max}^c$<br>(lm W <sup>-1</sup> ) | $CE_{max}^d$<br>(cd A <sup>-1</sup> ) | EQE (%) <sup>e</sup> |                              |                               | $\lambda_{EL}^f$<br>(nm) | CIE<br>(x, y) |
|--------|-------------------|--------------------------------------|---------------------------------------|---------------------------------------|----------------------|------------------------------|-------------------------------|--------------------------|---------------|
|        |                   |                                      |                                       |                                       | maximum              | at 100<br>cd m <sup>-2</sup> | at 1000<br>cd m <sup>-2</sup> |                          |               |
| A      | 3.7               | 5580                                 | 26.1                                  | 33.6                                  | 12.3                 | 9.5                          | 5.3                           | 504                      | (0.262,0.469) |
| B      | 3.9               | 5560                                 | 26.3                                  | 34.2                                  | 13.1                 | 9.4                          | 5.7                           | 500                      | (0.252,0.455) |

<sup>a</sup> Turn on voltage at a brightness of 1 cd m<sup>-2</sup>. <sup>b</sup> Maximum luminance. <sup>c</sup> Maximum power efficiency.

<sup>d</sup> Maximum current efficiency. <sup>e</sup> External quantum efficiency. <sup>f</sup> EL peak.
